# Supplementary material for: Risk of atypical femoral fracture during and after bisphosphonate use: Full report of a nationwide study
Source: PubMed Central journal article supplement — Acta Orthop. 2015 Jan 22;86(1):100–7. doi: 10.3109/17453674.2015.1004149 (PMC4366670; doi:10.3109/17453674.2015.1004149), 2015-01-22
Supplement: ORT-86-100-s7825.pdf [file ORT-86-100-s7825.pdf]

## Supplementary article data

# Risk of atypical femoral fracture during and after bisphosphonate use

## Full report of a nationwide study

Jörg SCHILCHER<sup>1</sup>, Veronika KOEPPEN<sup>1</sup>, Per ASPENBERG<sup>1</sup>, and Karl MICHAËLSSON<sup>2</sup>

---

<sup>1</sup>Orthopedics Section, Department of Clinical and Experimental Medicine, Faculty of Health Sciences, Linköping University, Linköping; <sup>2</sup>Orthopedics Section, Department of Surgical Sciences and Uppsala Clinical Research Center, Uppsala University, Uppsala, Sweden.  
Correspondence: Jorg.schilcher@lio.se

Table 1. ICD-10 codes for Charlson comorbidity index (Quad et al. 2005)<sup>a</sup>

| Comorbidities                                                                      | ICD-10 codes                                                                                                                                                                  |
|------------------------------------------------------------------------------------|-------------------------------------------------------------------------------------------------------------------------------------------------------------------------------|
| Myocardial infarction                                                              | I21.x, I22.x, I25.2                                                                                                                                                           |
| Congestive heart failure                                                           | I09.9, I11.0, I13.0, I13.2, I25.5, I42.0, I42.5–I42.9, I43.x, I50.x, P29.0                                                                                                    |
| Peripheral vascular disease                                                        | I70.x, I71.x, I73.1, I73.8, I73.9, I77.1, I79.0, I79.2, K55.1, K55.8, K55.9, Z95.8, Z95.9                                                                                     |
| Cerebrovascular disease                                                            | G45.x, G46.x, H34.0, I60.x–I69.x                                                                                                                                              |
| Dementia                                                                           | F00.x–F03.x, F05.1, G30.x, G31.1                                                                                                                                              |
| Chronic pulmonary disease                                                          | I27.8, I27.9, J40.x–J47.x, J60.x–J67.x, J68.4, J70.1, J70.3                                                                                                                   |
| Rheumatic disease                                                                  | M05.x, M06.x, M31.5, M32.x–M34.x, M35.1, M35.3, M36.0                                                                                                                         |
| Peptic ulcer disease                                                               | K25.x–K28.x                                                                                                                                                                   |
| Mild liver disease                                                                 | B18.x, K70.0–K70.3, K70.9, K71.3–K71.5, K71.7, K73.x, K74.x, K76.0, K76.2–K76.4, K76.8, K76.9, Z94.4                                                                          |
| Diabetes without chronic complication                                              | E10.0, E10.1, E10.6, E10.8, E10.9, E11.0, E11.1, E11.6, E11.8, E11.9, E12.0, E12.1, E12.6, E12.8, E12.9, E13.0, E13.1, E13.6, E13.8, E13.9, E14.0, E14.1, E14.6, E14.8, E14.9 |
| Diabetes with chronic complication                                                 | E10.2–E10.5, E10.7, E11.2–E11.5, E11.7, E12.2–E12.5, E12.7, E13.2–E13.5, E13.7, E14.2–E14.5, E14.7                                                                            |
| Hemiplegia or paraplegia                                                           | G04.1, G11.4, G80.1, G80.2, G81.x, G82.x, G83.0–G83.4, G83.9                                                                                                                  |
| Renal disease                                                                      | I12.0, I13.1, N03.2–N03.7, N05.2–N05.7, N18.x, N19.x, N25.0, Z49.0–Z49.2, Z94.0, Z99.2                                                                                        |
| Any malignancy, including lymphoma and leukemia, except malignant neoplasm of skin | C00.x–C26.x, C30.x–C34.x, C37.x–C41.x, C43.x, C45.x–C58.x, C60.x–C76.x, C81.x–C85.x, C88.x, C90.x–C97.x                                                                       |
| Moderate or severe liver disease                                                   | I85.0, I85.9, I86.4, I98.2, K70.4, K71.1, K72.1, K72.9, K76.5, K76.6, K76.7                                                                                                   |
| Metastatic solid tumor                                                             | C77.x–C80.x                                                                                                                                                                   |
| AIDS/HIV                                                                           | B20.x–B22.x, B24.x                                                                                                                                                            |

<sup>a</sup> ICD-10 diagnosis codes were retrieved from the National Patient Register. Charlson's comorbidity index predicts the 10-year mortality considering a range of comorbid conditions. Each condition is assigned a score of 1–6 depending on the risk of dying associated with this condition.

Table 5. Odds ratios (ORs), with 95% confidence intervals (CIs), for femoral stress fractures associated with bisphosphonate use by age, comorbidity, and other drug use

| Bisphosphonate use              | Cases    | Controls | Age- and sex-adjusted OR (CI) | Multi variable-adjusted <sup>a</sup> OR (CI) |
|---------------------------------|----------|----------|-------------------------------|----------------------------------------------|
| Age < 80 years                  |          |          |                               |                                              |
| Never use                       | 25       | 270      | 1.0 (ref.)                    | 1.0 (ref.)                                   |
| Ever use                        | 79 (76%) | 46 (15%) | 17 (9.9–30)                   | 20 (8.2–47)                                  |
| Age > 80 years                  |          |          |                               |                                              |
| Never use                       | 13       | 572      | 1.0 (ref.)                    | 1.0 (ref.)                                   |
| Ever use                        | 55 (81%) | 64 (10%) | 31 (21–47)                    | 28 (19–42)                                   |
| No use of proton-pump inhibitor |          |          |                               |                                              |
| Never use                       | 29       | 591      | 1.0 (ref.)                    | 1.0 (ref.)                                   |
| Ever use                        | 78 (73%) | 73 (11%) | 26 (13–50)                    | 26 (13–54)                                   |
| Use of proton-pump inhibitor    |          |          |                               |                                              |
| Never use                       | 9        | 251      | 1.0 (ref.)                    | 1.0 (ref.)                                   |
| Ever use                        | 56 (86%) | 37 (13%) | 31 (15–66)                    | 26 (17–41)                                   |
| No use of cortisone             |          |          |                               |                                              |
| Never use                       | 33       | 726      | 1.0 (ref.)                    | 1.0 (ref.)                                   |
| Ever use                        | 86 (72%) | 75 (9%)  | 29 (15–54)                    | 28 (15–54)                                   |
| Use of cortisone                |          |          |                               |                                              |
| Never use                       | 5        | 116      | 1.0 (ref.)                    | 1.0 (ref.)                                   |
| Ever use                        | 48 (91%) | 35 (23%) | 26 (6.0–117)                  | 29 (7.4–110)                                 |
| No previous fracture            |          |          |                               |                                              |
| Never use                       | 21       | 501      | 1.0 (ref.)                    | 1.0 (ref.)                                   |
| Ever use                        | 75 (78%) | 53 (9%)  | 38 (27–53)                    | 46 (29–73)                                   |
| Previous fracture               |          |          |                               |                                              |
| Never use                       | 17       | 341      | 1.0 (ref.)                    | 1.0 (ref.)                                   |
| Ever use                        | 59 (78%) | 57 (14%) | 16 (13–20)                    | 16 (13–19)                                   |

<sup>a</sup> Adjusted by age (continuous), sex, cortisone use (yes/no), and Charlson's index (continuous).  
NA: not applicable.
